# Supplementary material for: Fibrinogen and C-reactive protein score is a prognostic index for patients with hepatocellular carcinoma undergoing curative resection: a prognostic nomogram study
Source: PubMed Central journal article supplement — J Cancer. 2018 Jan 1;9(1):148–56. doi: 10.7150/jca.22246 (PMC5743722; doi:10.7150/jca.22246), 2018-01-01
Supplement: jcav09p0148s1.pdf [file jcav09p0148s1.pdf]

FigureS1.

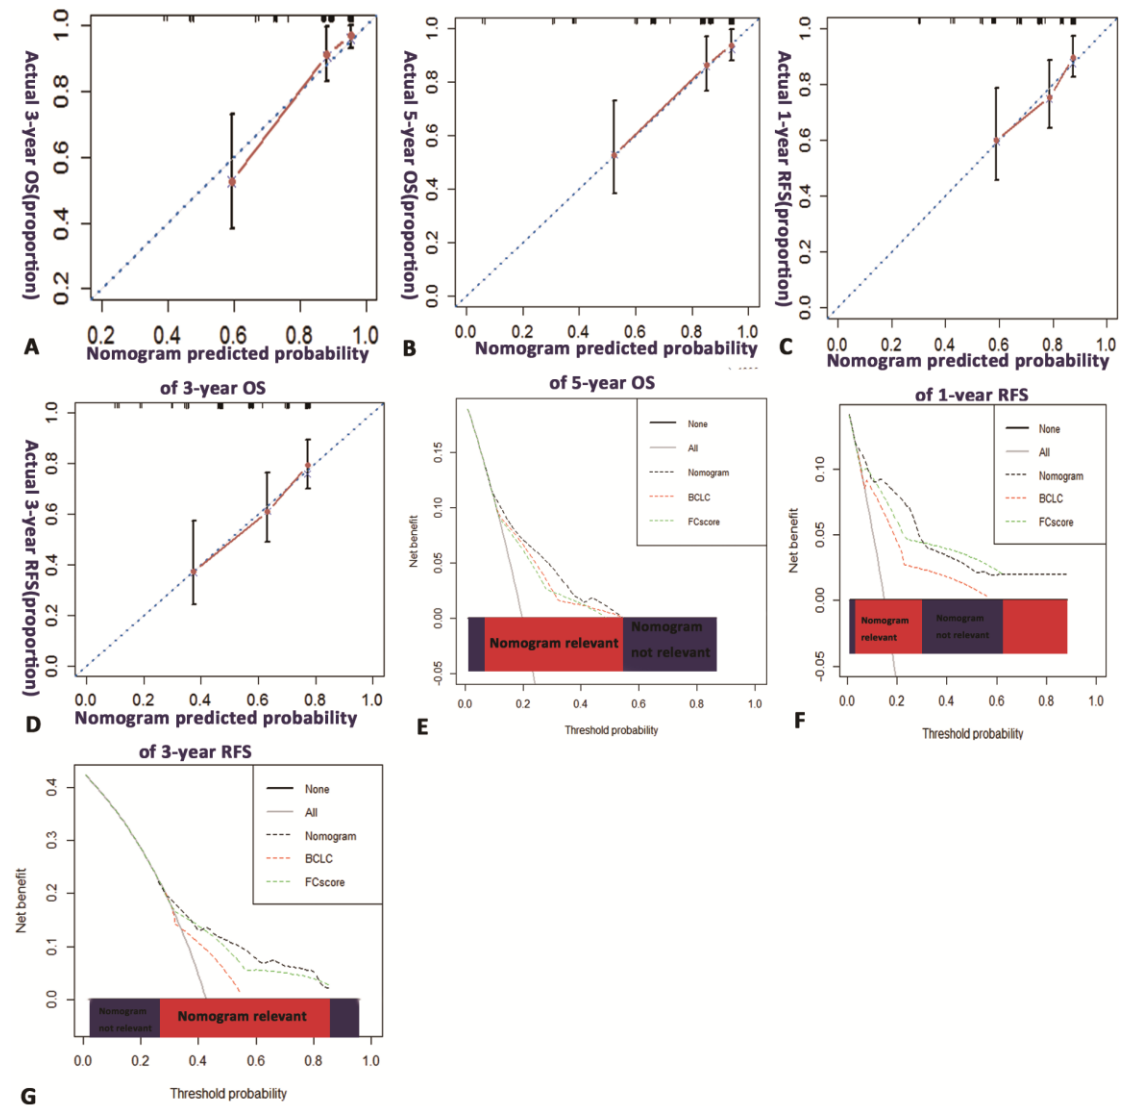

Figure. S1 Calibration curve and decision curve analysis for HCC in the validation curve. Calibration curve for predicting OS at 3-year(A),5-year(B), and for (C)RFS at 1 year, (D)3-year. On the decision curve analysis, nomogram show superior net benefit at 2-year (E),3-year (F) OS and 2-year RFS in the validation cohort.

Table S1. Univariate analyses for OS and RFS in patients with HCC

| characters                        | training cohort   |                       |                       | validation cohort |                       |                       |
|-----------------------------------|-------------------|-----------------------|-----------------------|-------------------|-----------------------|-----------------------|
|                                   |                   | OS                    | RFS                   |                   | OS                    | RFS                   |
|                                   | patients<br>n=616 | univariate<br>P-value | univariate<br>P-value | patients<br>n=152 | univariate<br>P-value | univariate<br>P-value |
| Gender, male/female               | 514/102           | 0.966                 | 0.19                  | 131/21            | 0.025                 | 0.002                 |
| Age, <60/≥60                      | 343/273           | 0.998                 | 0.27                  | 80/72             | 0.689                 | 0.956                 |
| HBsAg,<br>negative/positive       | 100/516           | 0.599                 | 0.15                  | 27/125            | 0.54                  | 0.12                  |
| AFP, <400/≥400 ng/mL              | 435/181           | <0.001                | <0.001                | 113/39            | 0.561                 | 0.929                 |
| TBIL, <20/≥20 μmol/L              | 558/58            | 0.678                 | 0.943                 | 136/16            | 0.832                 | 0.666                 |
| GGT, <45/≥45 U/L                  | 248/368           | 0.005                 | 0.003                 | 63/89             | 0.016                 | <0.001                |
| ALT, <50/≥50 U/L                  | 495/121           | 0.469                 | 0.115                 | 119/33            | 0.127                 | 0.048                 |
| ALB, <35/≥35g/L                   | 22/594            | 0.012                 | 0.091                 | 45/107            | 0.408                 | 0.007                 |
| FIB, <266/≥266mg/dL               | 399/217           | <0.001                | <0.001                | 102/50            | <0.001                | <0.001                |
| CRP, <10/≥10mg/L                  | 549/67            | <0.001                | <0.001                | 136/16            | <0.001                | <0.001                |
| PLT, <200/≥200 10 <sup>9</sup> /L | 509/107           | 0.313                 | 0.691                 | 124/28            | 0.999                 | 0.136                 |
| N, <6.3/≥6.3 10 <sup>9</sup> /L   | 552/64            | 0.662                 | 0.624                 | 140/12            | 0.829                 | 0.26                  |
| L, <3.2/≥3.2 10 <sup>9</sup> /L   | 580/36            | 0.797                 | 0.611                 | 145/7             | 0.398                 | 0.608                 |
| M, <0.6/≥0.6 10 <sup>9</sup> /L   | 439/177           | <0.001                | 0.004                 | 121/31            | 0.527                 | 0.548                 |
| cirrhosis, no/yes                 | 156/460           | 0.83                  | 0.057                 | 37/115            | 0.191                 | 0.184                 |
| tumor number,<br>single/multiple  | 533/83            | <0.001                | 0.002                 | 127/25            | 0.032                 | 0.003                 |
| tumor throbos, no/yes             | 577/39            | <0.001                | <0.001                | 143/9             | <0.001                | <0.001                |
| tumor capsule, no/yes             | 394/222           | 0.002                 | 0.088                 | 103/49            | 0.081                 |                       |
| tumor size, <5/≥5cm               | 360/256           | <0.001                | <0.001                | 78/74             | 0.002                 | 0.005                 |
| Lymph node metastasis,<br>no/yes  | 612/4             | 0.058                 | 0.904                 | 150/2             | <0.001                | 0.012                 |
| MVI, no/yes                       | 450/166           | <0.001                | <0.001                | 102/50            | 0.01                  | <0.001                |
| differentiation,<br>I-II/III-IV   | 421/195           | 0.002                 | 0.002                 | 104/48            | 0.03                  | 0.107                 |
| IBS, 0/1                          | 322/294           | <0.001                | <0.001                | 82/70             | <0.001                | 0.001                 |
| GPS, 0/1/2                        | 535/73/8          | <0.001                | <0.001                | 132/20/0          | 0.002                 |                       |
| IBI, 0/1/2                        | 13/551/52         | <0.001                | <0.001                | 39/103/10         | 0.003                 | <0.001                |
| FC-score, 0/1/2                   | 386/176/54        | <0.001                | <0.001                | 97/44/11          | <0.001                | <0.001                |
| BCLC, A/B/C                       | 401/186/29        | <0.001                | <0.001                | 91/52/9           | <0.001                | <0.001                |
| CLIP, 0/1-3/4-6                   | 337/272/7         | <0.001                | <0.001                | 87/61/4           | <0.001                | <0.001                |

APF , alpha fetal protein ; FIB , fibrinogen ; PLT , platelet ; LNM , lymph node metastasis ;  
MVI , microvascular invasion ; IBS , Inflammation based score ; GPS , Glasgow Prognostic  
Score ; IBI , inflammation based index ; FC-score , fibrinogen and C-reactive protein score ;  
BCLC , Barcelona Clinic Liver Cancer staging system ; CLIP , Cancer Liver Italian Program.
